# Supplementary material for: Diketopyrrolopyrrole-based ratiometric fluorescent probe for the sensitive and selective detection of cysteine over homocysteine and glutathione in living cells
Source: Royal Society of Chemistry journal article supplement (doi:10.1039/c5ra25220b), 2016-01-01
Supplement: c5ra25220b1.pdf [file c5ra25220b1.pdf]

## **Supporting Information**

### **Diketopyrrolopyrrole-based ratiometric fluorescent probe for the sensitive and selective detection of cysteine over homocysteine and glutathione in living cells**

Xiao Zhang, Yandi Hang, Weisong Qu, Yongchao Yan, Ping Zhao\*, Jianli Hua\*

Key Laboratory for Advanced Materials, Institute of Fine Chemicals, East China  
University of Science and Technology, 200237, Shanghai, China

## **Table of Contents**

|                                                                |           |
|----------------------------------------------------------------|-----------|
| <b>Experimental section</b>                                    | <b>S3</b> |
| <b>Time-dependent fluorescent spectra of DPPAC towards Cys</b> | <b>S4</b> |
| <b>MS titration of DPPAC with Cys</b>                          | <b>S4</b> |
| <b>Original spectral copy of new compounds</b>                 | <b>S5</b> |

## Experimental section

### Instrumentation and materials

$^1\text{H}$  NMR and  $^{13}\text{C}$  NMR spectra were recorded on a Bruker AM 400 MHz spectrometer, and tetramethyl silane (TMS) were used as an internal standard. Electrospray ionization and time-of-flight analyzer (ESI-TOF) mass spectra were determined by the Waters Micromass LCT mass spectrometer. Absorption spectra were recorded on a Varian Cary 500 UV-vis spectrophotometer. Fluorescence spectra were measured on a Horiba Fluoromax-4 Fluorescence spectrometer.

*N, N*-Dimethylformamide (DMF) was refluxed with calcium hydride and distilled before use. Tetrahydrofuran (THF) was pre-dried over 4 Å molecular sieves and distilled under an argon atmosphere from sodium sodium benzophenone ketyl immediately before use. All other reagents and reactants were purchased as commercial products from Sigma-Aldrich and used as received without further purification.

Absorption and fluorescence spectra were measured in DMSO-buffer solution (PBS: DMSO = 6: 4, v/v, pH = 7.4) at 37 °C.

Compound **1** and 4-(bis(4-methoxyphenyl)amino)phenyl boronic acid were prepared according to previous literature protocols [1, 2].

### Intracellular imaging

Hela cells were cultured at 37 °C and 5% CO<sub>2</sub> air condition and maintained 24 h before imaging by the confocal laser scanning microscopy. The cells was seeded in 14 mm glass culture flasks and allowed to adhere for 12 h.

## Time-dependent fluorescent spectra of DPP-AC towards Cys

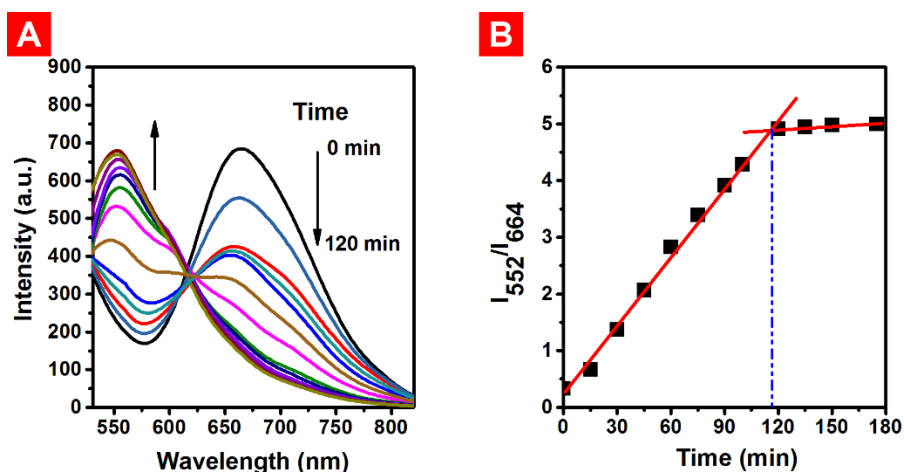

**Figure S1.** (A) Time-dependent fluorescent spectra of **DPP-AC** (10 μM) towards Cys (90 μM) with  $\lambda_{\text{ex}} = 510$  nm in DMSO-buffer solution (PBS: DMSO = 6: 4, v/v, pH = 7.4) at 37 °C. (B) Linear correction between the fluorescence ratio ( $I_{552}/I_{664}$ ) and reaction time (0-180 min) with  $\lambda_{\text{ex}} = 505$  nm in DMSO-buffer solution (PBS: DMSO = 6: 4, v/v, pH = 7.4) at 37 °C.

## MS titration of DPP-AC with Cys

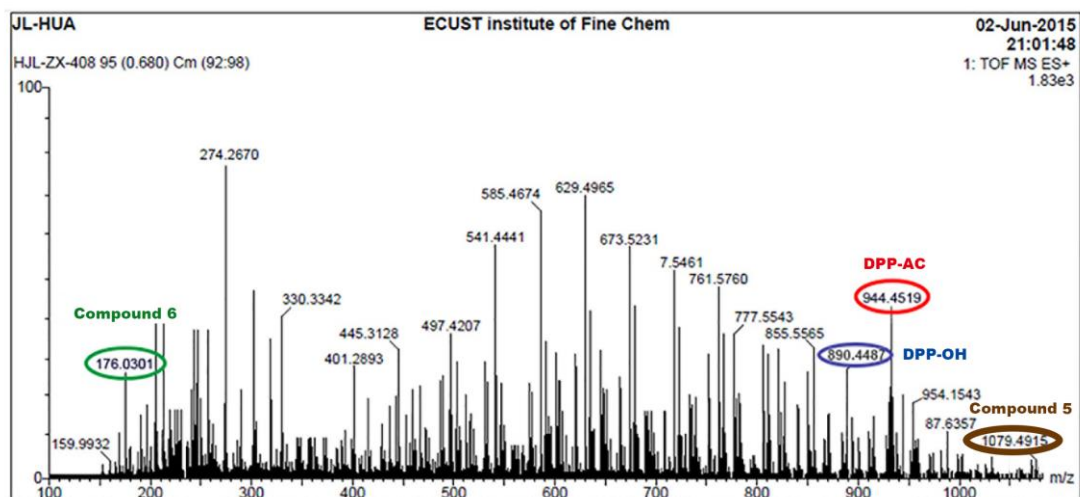

**Figure S2.** The MS titration of **DPP-AC** (10 μM) after the reaction with Cys (10 μM) for 30 min.

## Original spectral copy of new compounds

### $^1\text{H}$ NMR of compound 2

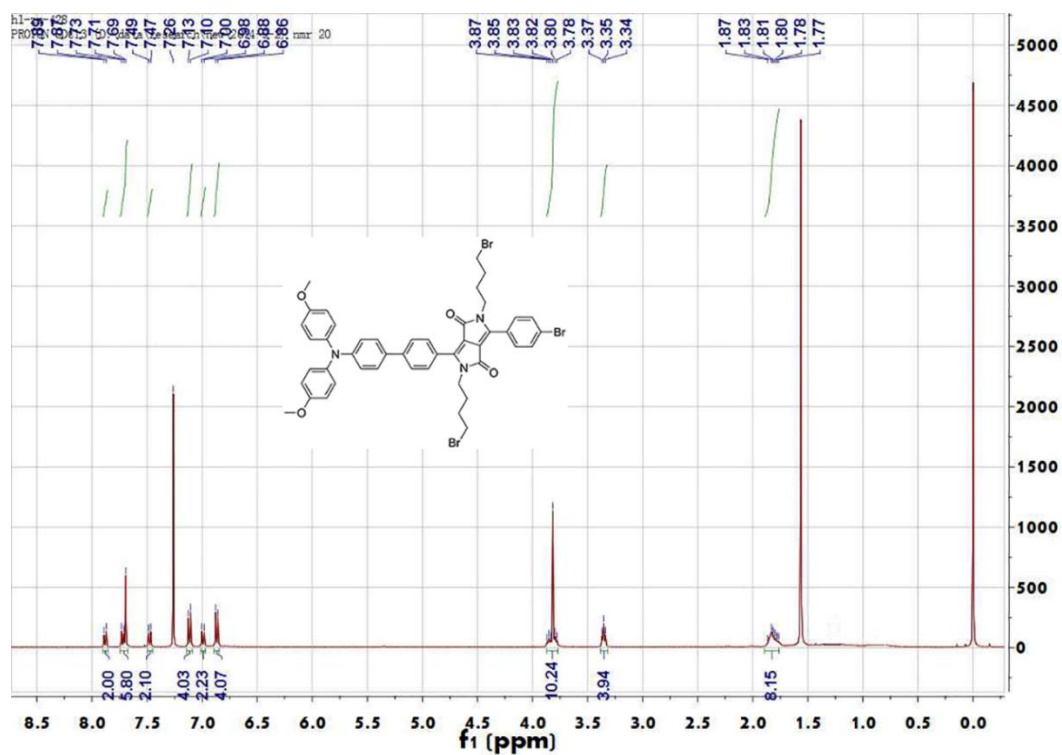

### $^{13}\text{C}$ NMR of compound 2

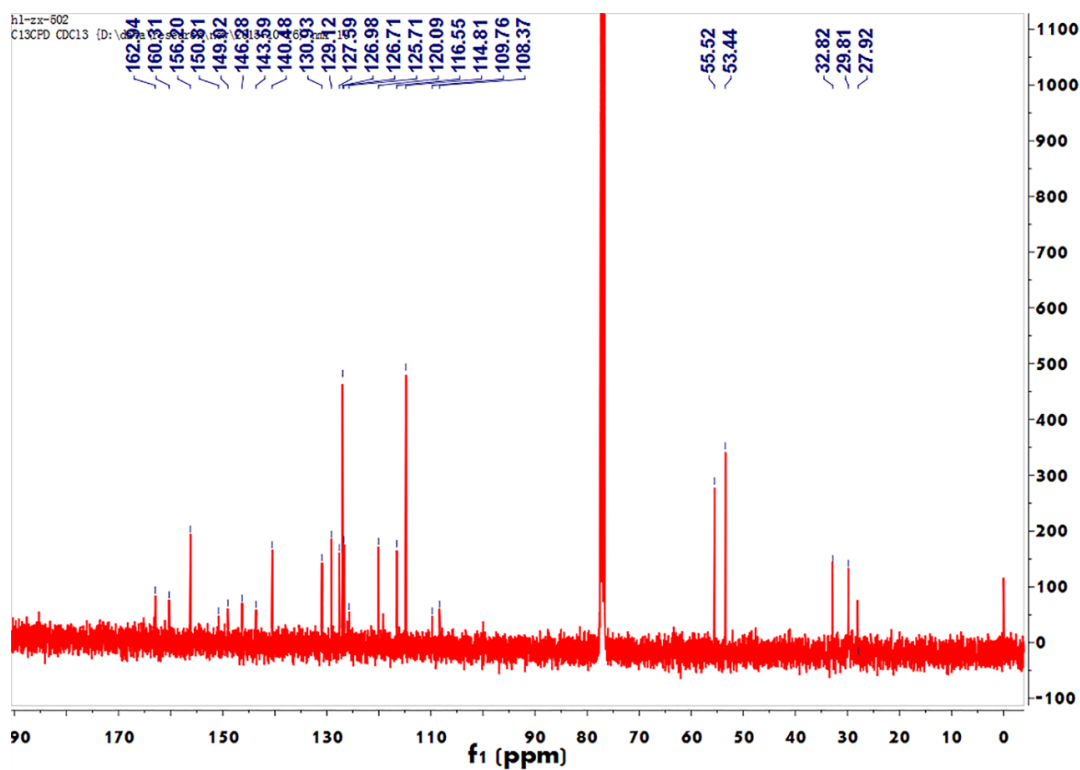

## MS of compound 2

### Elemental Composition Report

Page 1

#### Single Mass Analysis

Tolerance = 30.0 mDa / DBE: min = -1.5, max = 100.0

Element prediction: Off

Number of isotope peaks used for i-FIT = 2

Monoisotopic Mass, Even Electron Ions

189 formula(e) evaluated with 8 results within limits (up to 1 best isotopic matches for each mass)

Elements Used:

C: 0-60 H: 0-80 N: 0-5 O: 0-10

HUA-JL

ECUST Institute of Fine Chem

24-May-2014

10:04:04

1: TOF MS ES+

5.43e+002

HL-QWS-324 7 (0.298) Cm (6:8)

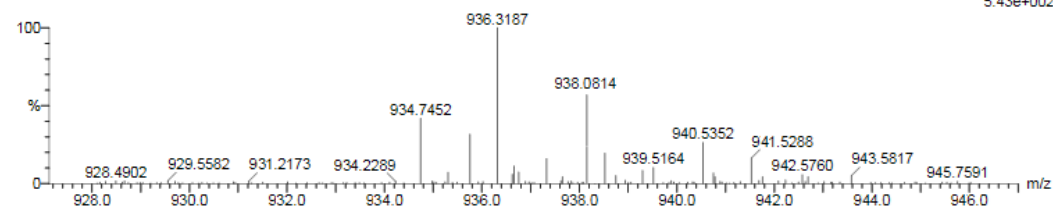

Minimum:

30.0

Maximum:

50.0

-1.5

100.0

| Mass     | Calc. Mass | mDa | PPM | DBE  | i-FIT | i-FIT (Norm) | Formula           |
|----------|------------|-----|-----|------|-------|--------------|-------------------|
| 938.0814 | 938.0804   | 1.4 | 1.4 | 35.5 | 59.8  | 0.0          | C46 H42 N3 O4 Br3 |

## <sup>1</sup>H NMR of compound 3

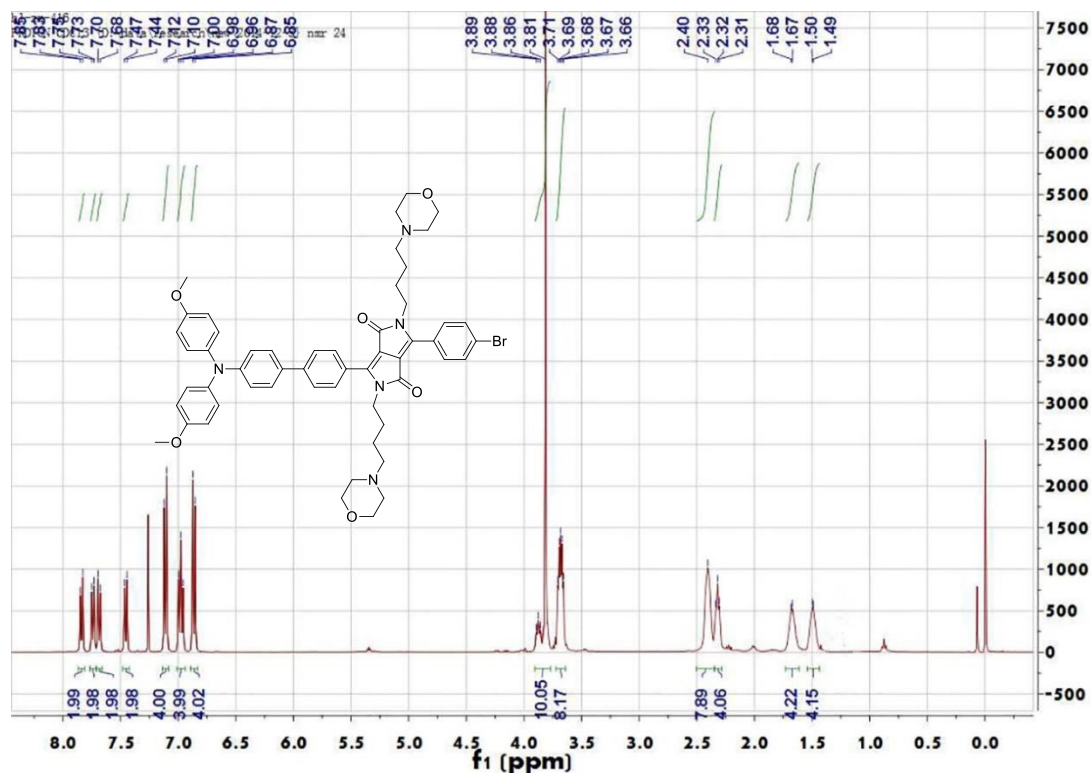

### <sup>13</sup>C NMR of compound 3

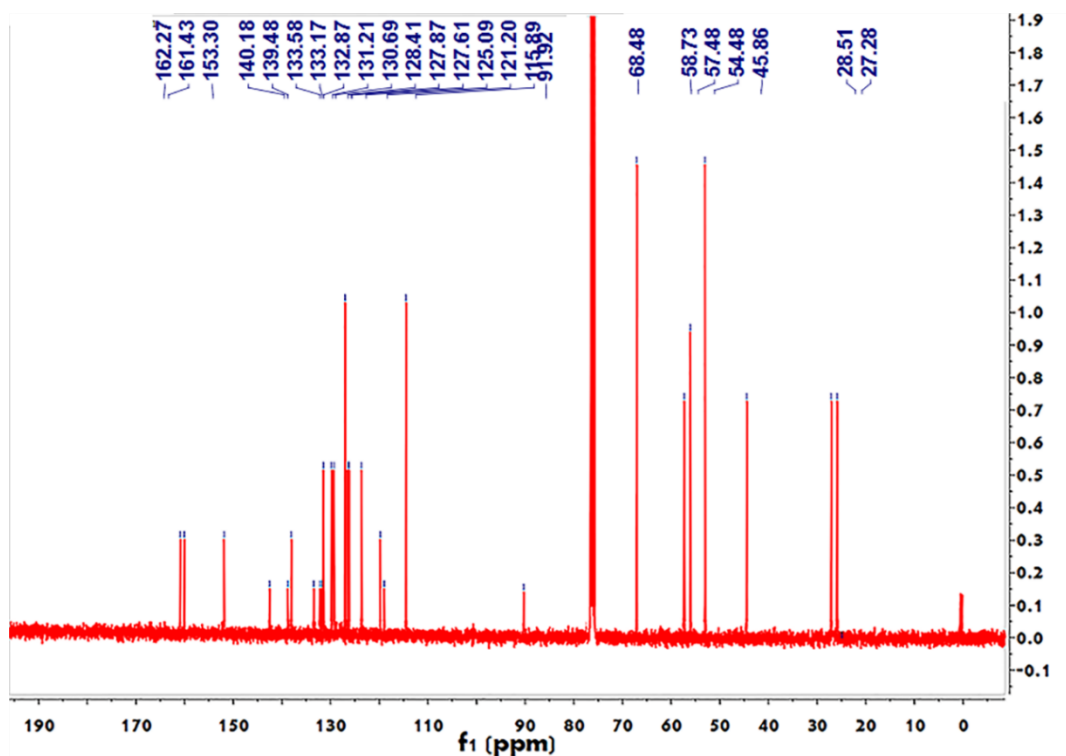

### MS of compound 3

#### Elemental Composition Report

Page 1

#### Single Mass Analysis

Tolerance = 30.0 mDa / DBE: min = -1.5, max = 100.0

Element prediction: Off

Number of isotope peaks used for i-FIT = 2

Monoisotopic Mass, Even Electron Ions

530 formula(e) evaluated with 1 results within limits (up to 1 best isotopic matches for each mass)

Elements Used:

C: 0-54 H: 0-59 N: 0-5 O: 0-6 Br: 0-1

JL-HUA

ECUST institute of Fine Chem

03-Dec-2014

21:24:32

1: TOF MS ES-

4.56e+004

HJL-ZX-408 35 (0.840) Cm (34:36)

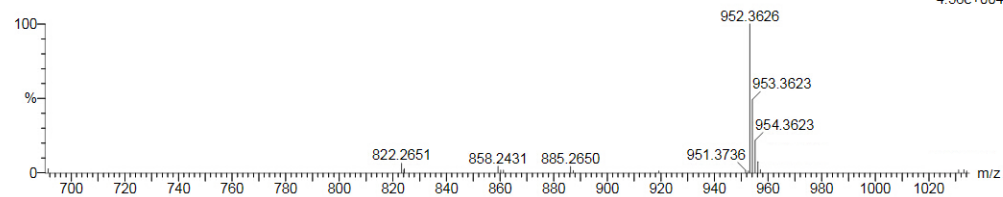

Minimum:

Maximum:

30.0

50.0

-1.5

100.0

Mass

Calc. Mass

mDa

PPM

DBE

i-FIT

i-FIT (Norm)

Formula

952.3626

952.3649

0.0

0.0

32.5

21.3

0.0

C54 H59 N5 O6 Br1

# <sup>1</sup>H NMR of compound 4

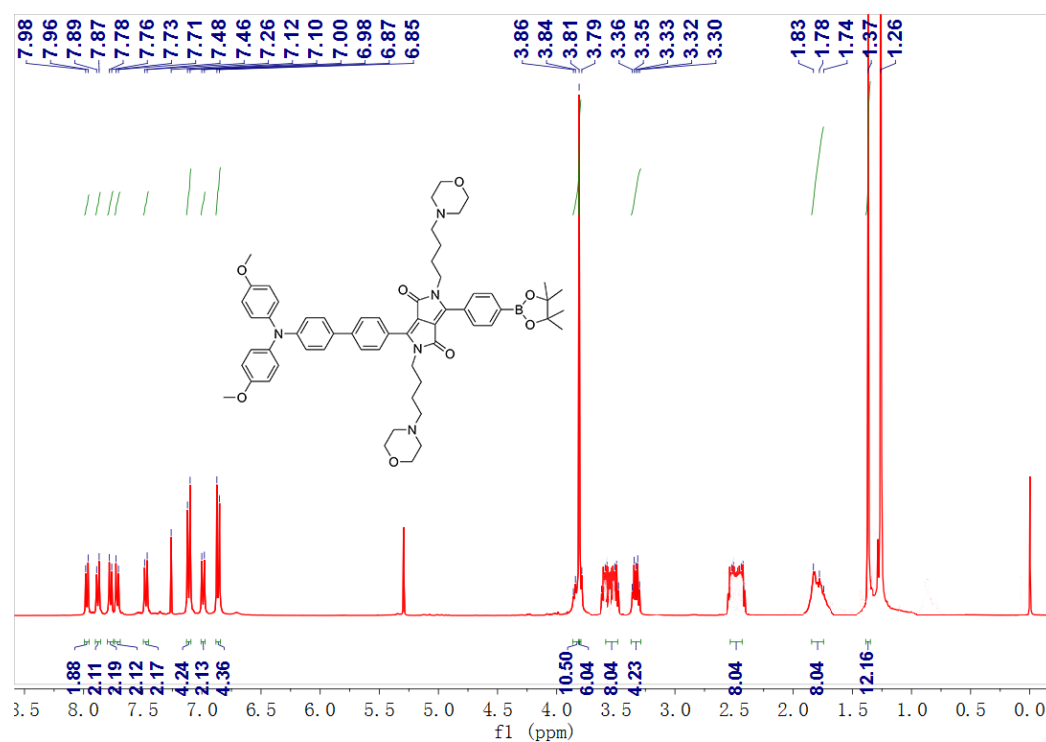

# <sup>13</sup>C NMR of compound 4

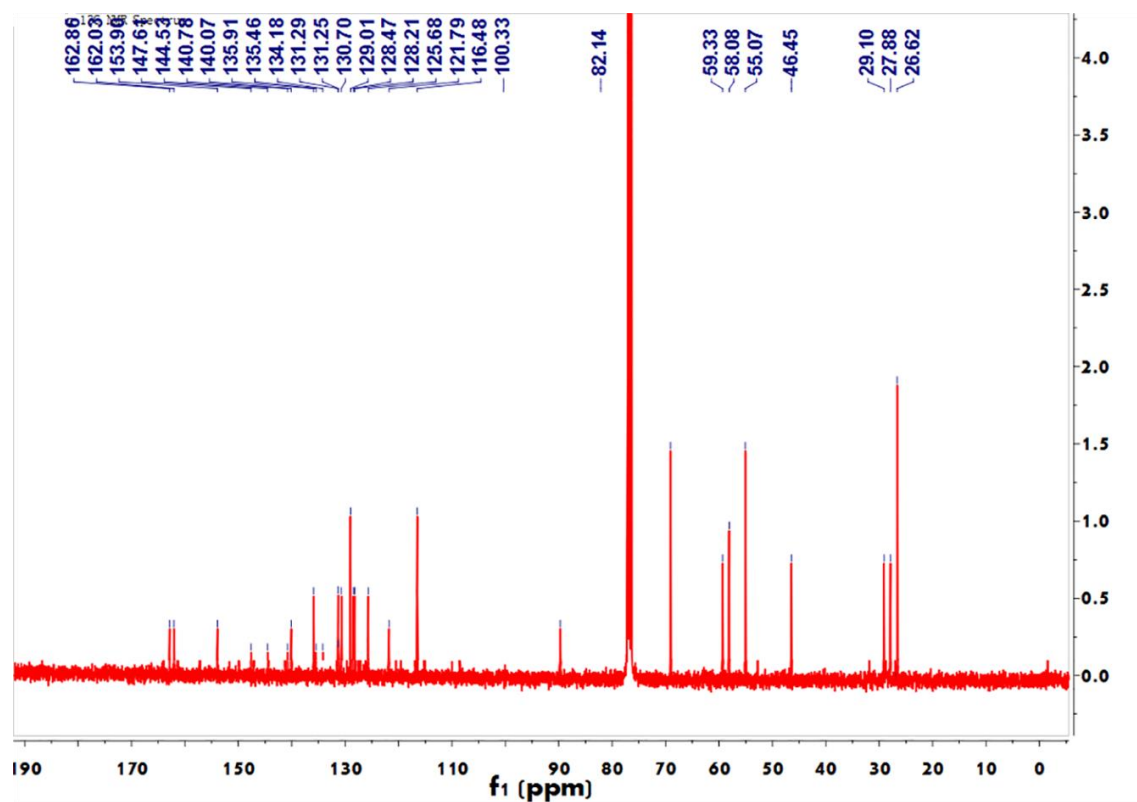



## MS of compound 4

### Elemental Composition Report

Page 1

#### Single Mass Analysis

Tolerance = 50.0 PPM / DBE: min = -1.5, max = 100.0

Element prediction: Off

Number of isotope peaks used for i-FIT = 2

Monoisotopic Mass, Even Electron Ions

44 formula(e) evaluated with 1 results within limits (up to 1 closest results for each mass)

Elements Used:

C: 0-60 H: 0-73 N: 0-5 O: 0-8 B: 0-1

JL-HUA

ECUST institute of Fine Chem

10-Jun-2015

21:41:41

1: TOF MS ES+

9.44e+003

HL-ZX-22 218 (1.443) Cm (216:222)

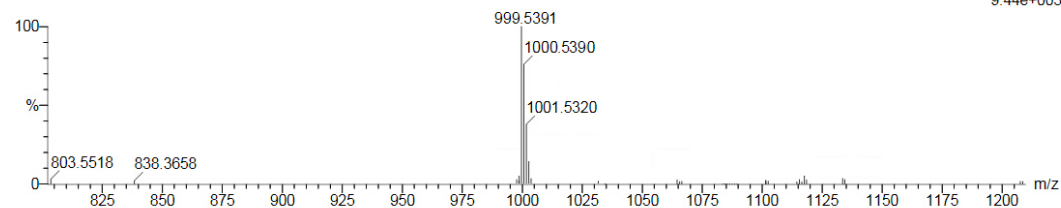

| Minimum:  |            |       |      | -1.5  |       |              |                  |  |
|-----------|------------|-------|------|-------|-------|--------------|------------------|--|
| Maximum:  |            | 300.0 | 50.0 | 100.0 |       |              |                  |  |
| Mass      | Calc. Mass | mDa   | PPM  | DBE   | i-FIT | i-FIT (Norm) | Formula          |  |
| 1000.5390 | 1000.5396  | 0.8   | 0.7  | 35.5  | 12.4  | 0.0          | C60 H73 N5 O8 B1 |  |

## <sup>1</sup>H NMR of compound DPP-OH

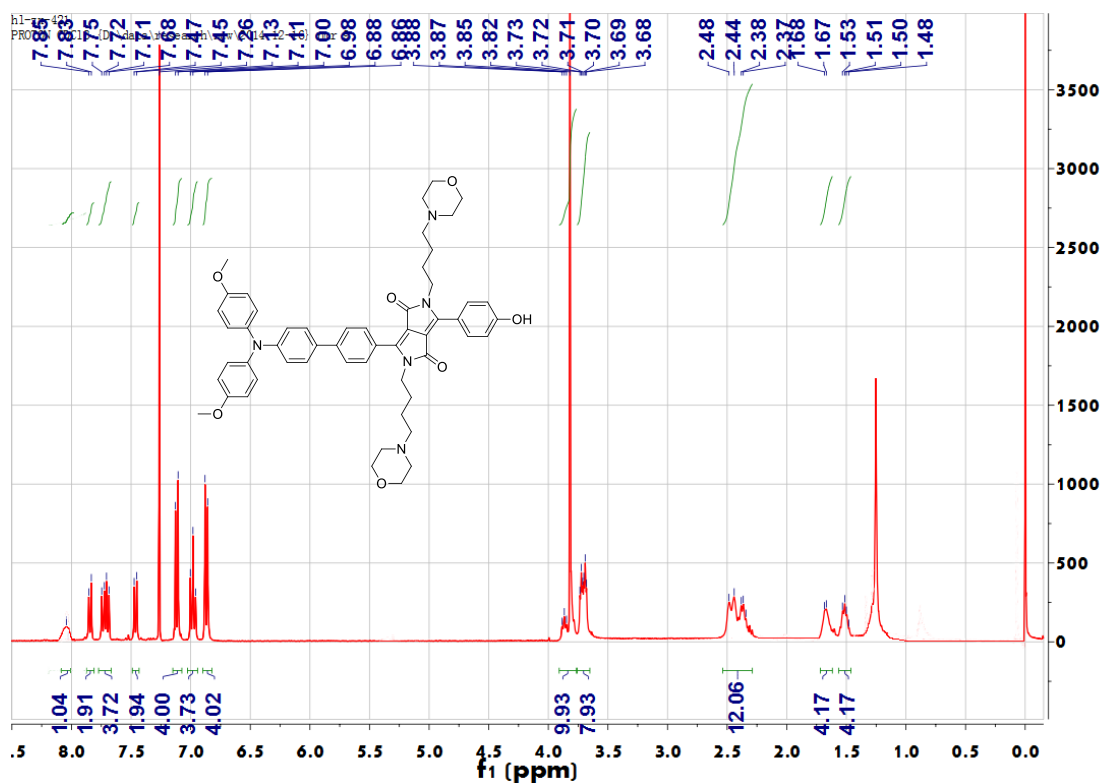

## <sup>13</sup>C NMR of compound DPP-OH

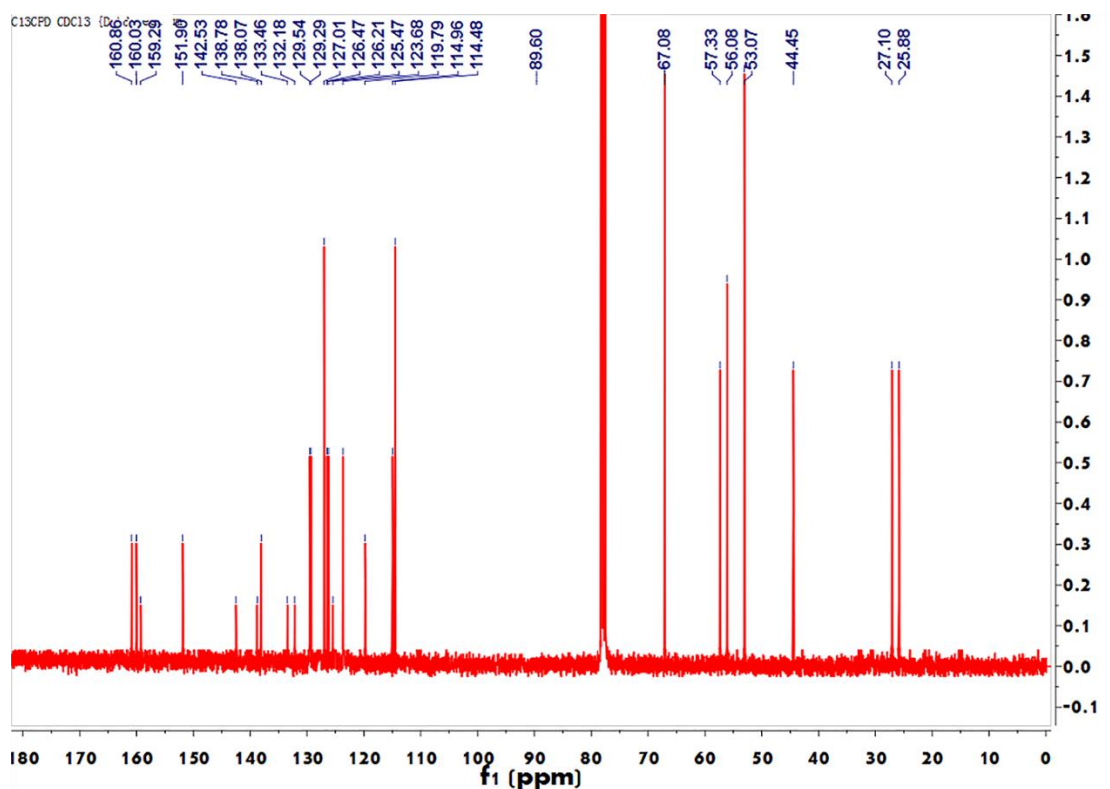

## MS of compound DPP-OH

### Elemental Composition Report

Page 1

#### Single Mass Analysis

Tolerance = 50.0 PPM / DBE: min = -1.5, max = 100.0

Element prediction: Off

Number of isotope peaks used for i-FIT = 2

Monoisotopic Mass, Even Electron Ions

1 formula(e) evaluated with 1 results within limits (up to 1 closest results for each mass)

Elements Used:

C: 0-54 H: 0-60 N: 0-5 O: 0-7

JL-HUA

ECUST institute of Fine Chem

HL-ZX-016 103 (0.729) Cm (101:104)

10-Jun-2015

21:22:35

1: TOF MS ES+

2.63e+003

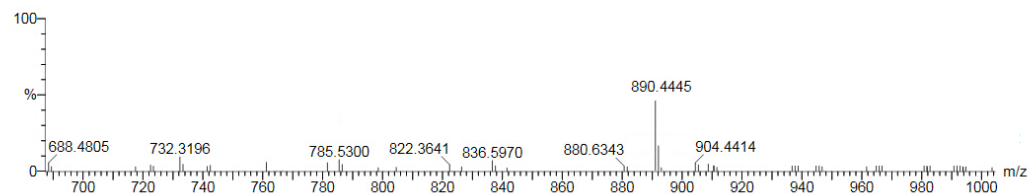

Minimum:

Maximum:

300.0 50.0 -1.5  
100.0

| Mass     | Calc. Mass | mDa  | PPM  | DBE  | i-FIT | i-FIT (Norm) | Formula       |
|----------|------------|------|------|------|-------|--------------|---------------|
| 890.4445 | 890.4493   | -0.9 | -1.1 | 39.5 | 19.3  | 0.0          | C54 H60 N5 O7 |

# <sup>1</sup>H NMR of compound DPP-AC

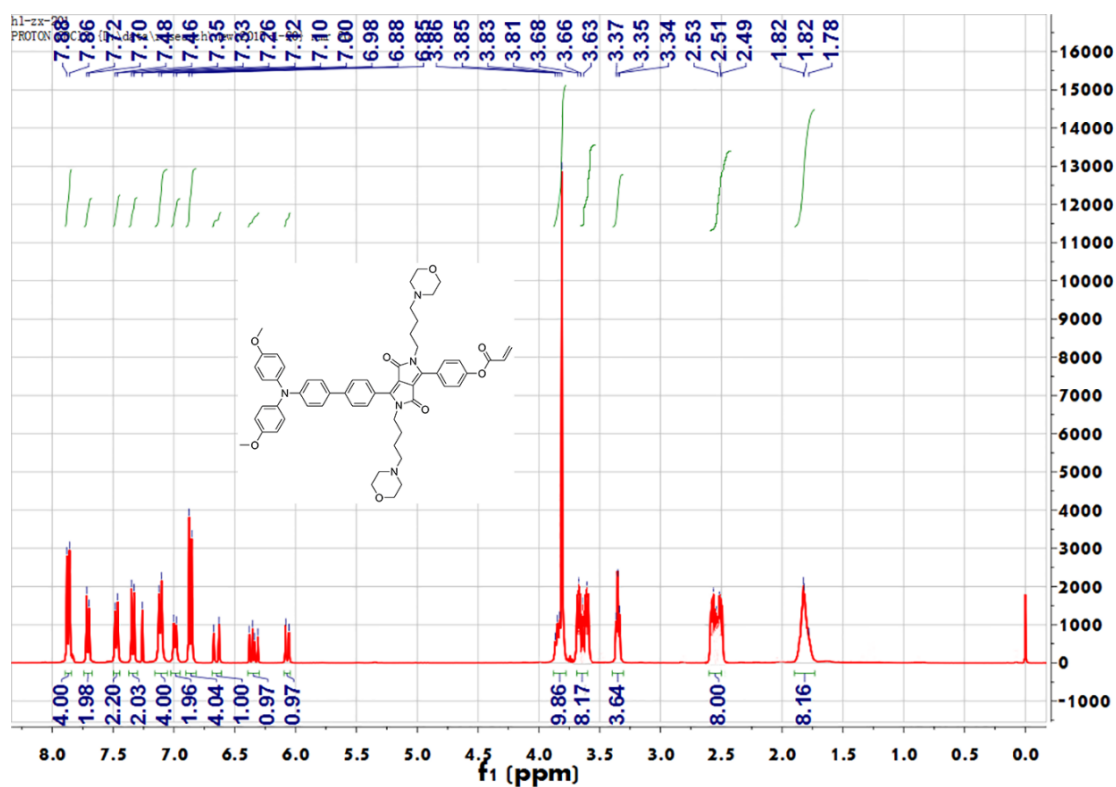

# <sup>13</sup>C NMR of compound DPP-AC

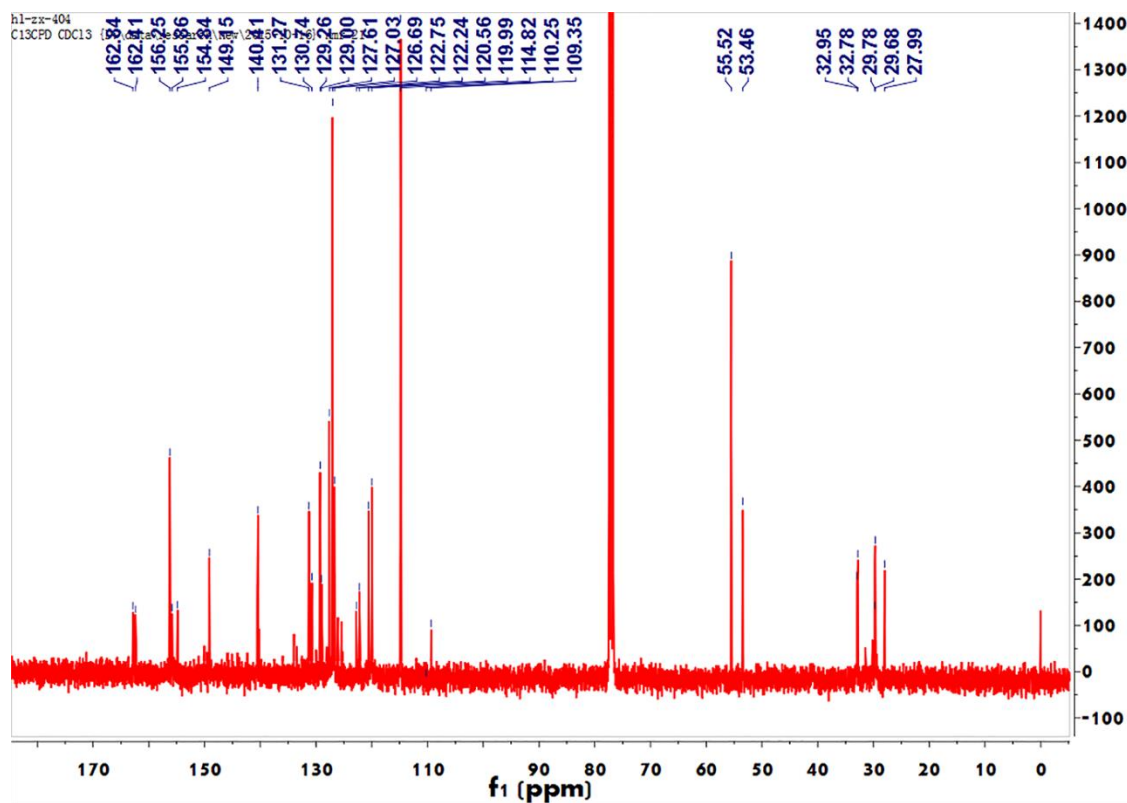

## MS of compound DPP-AC

### Single Mass Analysis

Tolerance = 50.0 PPM / DBE: min = -1.5, max = 100.0

Element prediction: Off

Number of isotope peaks used for i-FIT = 2

Monoisotopic Mass, Even Electron Ions

171 formula(e) evaluated with 6 results within limits (up to 1 closest results for each mass)

Elements Used:

C: 0-57 H: 0-100 N: 0-5 O: 0-8

JL-HUA

ECUST institute of Fine Chem

02-Jun-2015

21:09:07

HJL-ZX-409 117 (0.809) Cm (112:118)

1: TOF MS ES+

1.21e+003

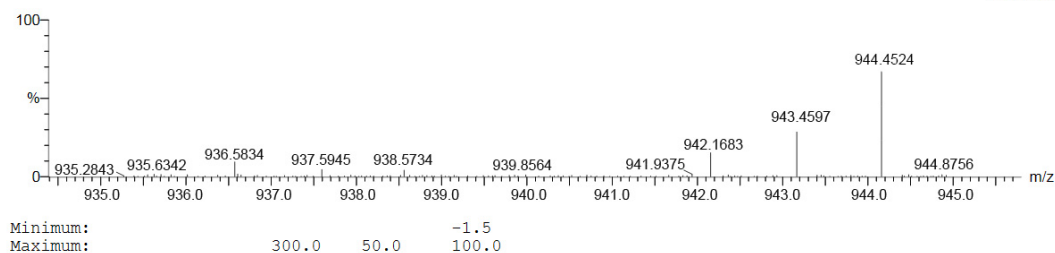

## References and notes

- [1] S. Y. Qu, W. J. Wu, J. L. Hua, C. Kong, Y. T. Long and H. Tian, *J. Phys. Chem. C*, 2010, **114**, 1343-1349.
- [2] Y. D. Hang, L. Yang, Y. Qu and J. L. Hua, *Tetrahedron Letter*, 2014, **55**, 6998-7001.
